# Supplementary material for: Preparation and investigation of temperature-responsive calix[4]arene-based molecular gels
Source: Royal Society of Chemistry journal article supplement (doi:10.1039/c7ra02076g), 2017-01-01
Supplement: c7ra02076g1.pdf [file c7ra02076g1.pdf]

# Supporting Information

*for*

## Preparation and Investigatuin of Temperature-Responsive Calix[4]arene-based Molecular Gels

Xiuqin Cai\*,<sup>a,b</sup> Yunhua Xu<sup>a</sup>, Rong Yang<sup>a</sup>, Hui Yang<sup>c</sup>

School of Materials Science and Engineering, Xi'an University of Technology, Xi'an, 710048, China.

E-mail: [caixiuqin16@163.com](mailto:caixiuqin16@163.com)

### 1. Solvent polar dependence of the gel-networks

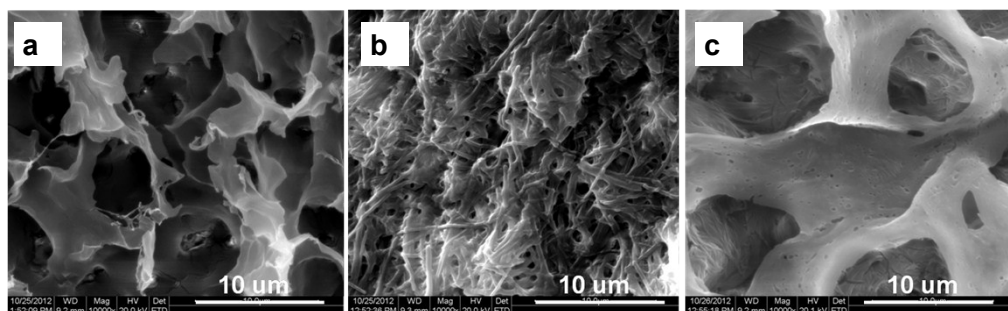

Fig. S1 SEM images of the gel **1** in Decane(a), Toluene(b), Butanol(c) (2.5%, w/v)

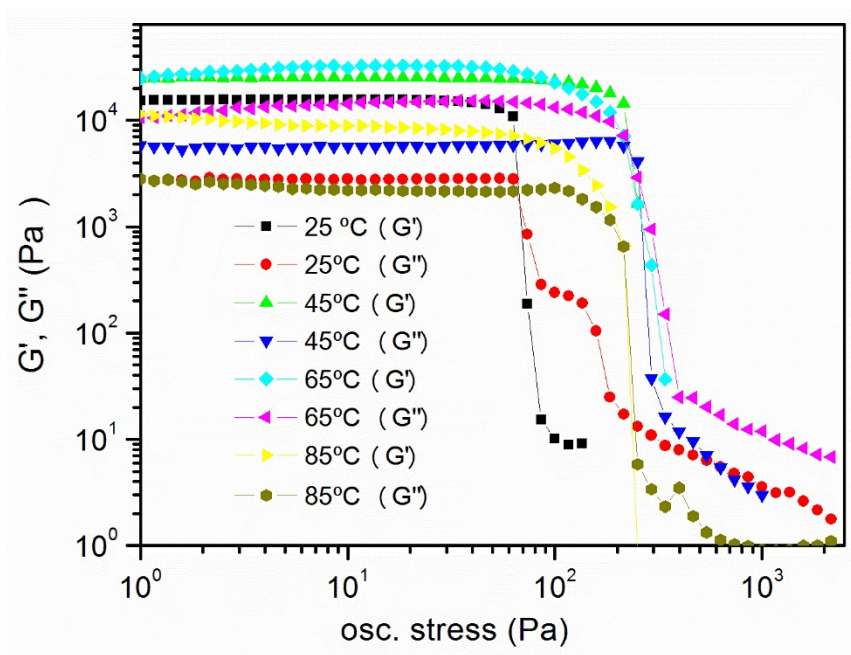

Fig. S2 Evolution of  $G', G''$  as a function of the applied shear stress of **1** in kerosene
